# Supplementary material for: General component additivity, reaction engineering, and machine learning models for hydrothermal liquefaction
Source: Royal Society of Chemistry journal article supplement (doi:10.1039/d4su00737a), 2025-01-01
Supplement: d4su00737a1.pdf [file d4su00737a1.pdf]

1 Supplementary information for: General Component Additivity,  
2 Reaction Engineering, and Machine Learning Models for  
3 Hydrothermal Liquefaction

4 Peter M. Guirguis, Philip E. Savage\*

Chemical Engineering Department, Pennsylvania State University,  
121D CBEB Building, 375 Science Dr, University Park, PA 16802, USA

\* psavage@psu.edu

Table S1<sup>†</sup>: Parameters for the component additivity model in Eqn. 11.

| Parameter label     | Parameters values for $\ln(SI)$    |          |         |         |        |           |
|---------------------|------------------------------------|----------|---------|---------|--------|-----------|
|                     | L                                  | $k_1$    | $k_2$   | $s_1$   | $s_2$  | M         |
| $C_{St}$            | -56.5                              | 0.00216  | 1.74    | -0.881  | -0.876 | 43.6      |
| $C_{Ce}$            | 36.3                               | 0.738    | 0.147   | -1.40   | 0.738  | 11.6      |
| $C_{He}$            | 168                                | 1.79     | 0.905   | 0.101   | 1.45   | 18.0      |
| $C_{Pe}$            | -6.16                              | 0.000147 | 551     | -0.797  | 0.410  | 41.9      |
| $C_{Lp}$            | 94.6                               | 0.143    | 0.949   | 4.63    | 4.63   | 65.8      |
| $C_{Lg}$            | 50.9                               | 3.96     | 26.4    | 0.544   | 3.08   | 3.26      |
| $C_{Sa}$            | -7.75                              | 10.8     | 78.9    | -3.92   | 2.50   | -5.90e-05 |
| $C_{AA}$            | -121                               | 18.0     | 0.911   | 6.75    | 6.75   | 8.03      |
| $C_{FA}$            | 106                                | 0.216    | 18.4    | -7.16   | 2.35   | 38.3      |
| $C_{Ph}$            | 143                                | 0.158    | 0.810   | -3.14   | 2.54   | 21.6      |
| $C_{C_t, P_t}$      | 284                                | 0.323    | 1.97    | 0.893   | 3.16   | -54.0     |
| $C_{C_t, F_t}$      | 483                                | 0.175    | 5.20    | -6.52   | -1.09  | -62.6     |
| $C_{P_t, F_t}$      | -381                               | 2.63e-05 | 67.0    | -5.06   | 5.95   | -0.360    |
| $C_{C_t, P_t, F_t}$ | -1810                              | 0.000453 | 0.267   | -0.377  | -0.373 | 330       |
| $C_{C_t, P_t, L_t}$ | -825                               | 0.554    | 0.221   | -9.53   | -0.285 | -4.36     |
| label               | Parameters values for loading mass |          |         |         |        |           |
|                     | $k_3$                              | $k_4$    | $s_3$   | $s_4$   |        |           |
| $C_{St}$            | 5.50                               | 0.203    | -0.882  | 0.00475 |        |           |
| $C_{Ce}$            | 2.22                               | 0.0921   | -0.0543 | 8.85    |        |           |
| $C_{He}$            | 0.578                              | 0.138    | -2.54   | 8.70    |        |           |
| $C_{Pe}$            | 2.41                               | 1.38     | 10.1    | 96.1    |        |           |
| $C_{Lp}$            | 0.146                              | 0.192    | -1.08   | 39.5    |        |           |
| $C_{Lg}$            | 0.165                              | 0.00201  | 2.59    | 12.7    |        |           |
| $C_{Sa}$            | 3.79e-05                           | 0.0788   | -1.19   | -0.891  |        |           |
| $C_{AA}$            | 0.0625                             | 0.00648  | 0.673   | 0.844   |        |           |
| $C_{FA}$            | 4.04                               | 0.0102   | 2.50    | 2.52    |        |           |
| $C_{Ph}$            | 0.874                              | 0.000256 | 2.50    | 8.93    |        |           |
| $C_{C_t, P_t}$      | 0.0454                             | 14.5     | 1.74    | 18.9    |        |           |
| $C_{C_t, F_t}$      | 1.91                               | 0.253    | 2.41    | 2.41    |        |           |
| $C_{P_t, F_t}$      | 3.21                               | 0.0300   | 8.45    | 8.63    |        |           |
| $C_{C_t, P_t, F_t}$ | 0.218                              | 32.0     | 2.99    | 10.8    |        |           |
| $C_{C_t, P_t, L_t}$ | 0.0421                             | 3.90     | 5.21    | 5.84    |        |           |

Table S2<sup>†</sup>: Statistical analysis for model prediction of the full prediction dataset (112 biocrude yields).

| Model label                          | Number of parameters | $Med[\epsilon]$<br>(wt%) | $ \epsilon $<br>(wt%) | $Med[ \epsilon ]$<br>(wt%) | MAPE<br>% | % < 5<br>% | % < 10<br>% |
|--------------------------------------|----------------------|--------------------------|-----------------------|----------------------------|-----------|------------|-------------|
| Component additivity model           | 150                  | 1.61                     | 8.33                  | 6.33                       | 67.9      | 42.9       | 67.0        |
| Reaction engineering model           | 56                   | 0.950                    | 8.04                  | 5.53                       | 77.2      | 47.3       | 67.0        |
| Decision Tree Algorithm              | 924                  | 1.08                     | 6.64                  | 4.60                       | 43.5      | 52.7       | 80.4        |
| Valdez and Savage [1]                | 22                   | -4.14                    | 14.7                  | 10.6                       | 132       | 26.8       | 46.3        |
| Hietala <i>et al.</i> [2]            | 14                   | 7.25                     | 14.3                  | 11.8                       | 75.3      | 27.7       | 43.8        |
| Obeid <i>et al.</i> [3]              | 34                   | 11.0                     | 16.4                  | 14.7                       | 107       | 21.4       | 33.0        |
| Qian <i>et al.</i> [4]               | 10                   | 1.30                     | 14.5                  | 12.0                       | 94.3      | 24.1       | 41.1        |
| Obeid <i>et al.</i> [5] <sup>a</sup> | 34                   | 16.7                     | 21.3                  | 16.8                       | 106       | 9.82       | 27.7        |
| Obeid <i>et al.</i> [5] <sup>b</sup> | 34                   | 26.2                     | 27.8                  | 26.2                       | 89.5      | 11.6       | 15.2        |
| Saral <i>et al.</i> [6]              | 12                   | -3.20                    | 16.6                  | 13.2                       | 111       | 22.3       | 35.7        |
| Déniel <i>et al.</i> [7]             | 8                    | 7.87                     | 14.1                  | 12.7                       | 61.4      | 23.2       | 43.8        |
| Yang <i>et al.</i> [8]               | 7                    | 4.49                     | 12.1                  | 9.04                       | 92.4      | 27.7       | 55.4        |
| Lu <i>et al.</i> [9]                 | 11                   | 2.76                     | 10.6                  | 8.41                       | 89.0      | 34.8       | 57.1        |
| Yang <i>et al.</i> [10]              | 10                   | 5.99                     | 13.9                  | 11.2                       | 94.0      | 24.1       | 39.3        |
| Mahadevan Subramanya and Savage [11] | 30                   | 5.12                     | 11.9                  | 11.2                       | 94.2      | 24.1       | 52.7        |

a is the reaction network fitted to sewage sludge.

b is the reaction network fitted to pine wood.

Table S3<sup>†</sup>: Statistical analysis for model prediction for HTL of biomass with no lignin (88 biocrude yields).

| Model label                          | Number of parameters | $Med[\epsilon]$ (wt%) | $ \overline{\epsilon} $ (wt%) | $Med[ \epsilon ]$ (wt%) | MAPE % | % < 5 % | % < 10 % |
|--------------------------------------|----------------------|-----------------------|-------------------------------|-------------------------|--------|---------|----------|
| Component additivity model           | 150                  | 1.07                  | 8.51                          | 6.65                    | 75.2   | 42.0    | 67.0     |
| Reaction engineering model           | 56                   | 0.864                 | 7.85                          | 5.29                    | 83.6   | 48.9    | 67.0     |
| Decision Tree Algorithm              | 924                  | 1.50                  | 7.29                          | 5.38                    | 44.7   | 50.0    | 77.3     |
| Valdez and Savage [1]                | 22                   | -1.31                 | 14.1                          | 9.04                    | 120    | 28.4    | 52.3     |
| Valdez <i>et al.</i> [12]            | 20                   | 1.91                  | 15.9                          | 9.28                    | 99.4   | 31.8    | 51.1     |
| Hietala <i>et al.</i> [2]            | 14                   | 6.87                  | 14.5                          | 11.4                    | 78.4   | 28.4    | 44.3     |
| Vo <i>et al.</i> [13]                | 20                   | -3.95                 | 15.7                          | 11.6                    | 104    | 25.0    | 44.3     |
| Vo <i>et al.</i> [14]                | 34                   | -7.32                 | 18.6                          | 16.8                    | 107    | 14.8    | 33.0     |
| Sheehan and Savage [15] <sup>a</sup> | 20                   | -3.58                 | 14.0                          | 9.66                    | 133    | 31.8    | 51.1     |
| Sheehan and Savage [15] <sup>b</sup> | 32                   | -0.143                | 13.5                          | 8.88                    | 128    | 31.8    | 52.3     |
| Palomino <i>et al.</i> [16]          | 6                    | -0.767                | 12.8                          | 9.23                    | 128    | 31.8    | 52.3     |
| Qian <i>et al.</i> [4]               | 10                   | 1.30                  | 15.1                          | 12.4                    | 102    | 22.7    | 39.8     |
| Hietala and Savage [17]              | 28                   | 0.235                 | 12.7                          | 8.93                    | 58.4   | 27.3    | 58.0     |
| Obeid <i>et al.</i> [5] <sup>c</sup> | 30                   | 14.4                  | 21.4                          | 17.6                    | 127    | 14.8    | 20.5     |
| Saral <i>et al.</i> [6]              | 12                   | -1.67                 | 16.0                          | 12.3                    | 93.3   | 26.1    | 39.8     |
| Biller and Ross [18]                 | 3                    | 9.90                  | 13.3                          | 11.4                    | 86.3   | 23.9    | 40.9     |
| Teri <i>et al.</i> [19] <sup>d</sup> | 6                    | 0.0                   | 11.2                          | 7.49                    | 130    | 35.2    | 63.6     |
| Teri <i>et al.</i> [19] <sup>e</sup> | 6                    | 1.61                  | 11.3                          | 7.73                    | 125    | 31.8    | 63.6     |
| Teri <i>et al.</i> [19] <sup>f</sup> | 12                   | -2.18                 | 11.3                          | 7.49                    | 134    | 36.4    | 60.2     |
| Teri <i>et al.</i> [19] <sup>g</sup> | 12                   | -1.66                 | 11.3                          | 7.40                    | 128    | 34.1    | 59.1     |
| Leow <i>et al.</i> [20]              | 3                    | -7.23                 | 13.0                          | 9.18                    | 168    | 29.5    | 52.3     |
| Li <i>et al.</i> [21]                | 3                    | -8.83                 | 13.9                          | 10.7                    | 184    | 19.3    | 43.2     |
| Shakya <i>et al.</i> [22]            | 6                    | -9.17                 | 13.8                          | 11.1                    | 163    | 25.0    | 44.3     |
| Hietala <i>et al.</i> [23]           | 10                   | -10.4                 | 21.2                          | 12.1                    | 313    | 20.5    | 40.9     |
| Sheng <i>et al.</i> [24]             | 6                    | -6.16                 | 14.9                          | 10.3                    | 151    | 19.3    | 48.9     |
| Wagner <i>et al.</i> [25]            | 12                   | 4.98                  | 12.2                          | 9.52                    | 83.3   | 31.8    | 54.5     |
| Aierzhati <i>et al.</i> [26]         | 9                    | 14.4                  | 20.8                          | 17.1                    | 87.2   | 14.8    | 30.7     |

a is the reaction network without interactions.

b is the reaction network with interactions.

c is the reaction network fitted to microalgae.

d is the component additivity model fitted to HTL of soy protein, cornstarch, and castor oil data.

e is the component additivity model fitted to HTL of cellulose, albumin, and sunflower oil data.

f is the component additivity model in d with interactions.

g is the component additivity model in e with interactions.

5 We added lignin as a component for selected reaction engineering models in the literature and then  
6 reparameterized each model. For the model from Hietala and Savage [17], we added a pathway from  
7 lignin to oligolignols, Olg, to monolignols or lignols, Lgl, and these lignols can undergo decarboxylation  
8 producing biocrude and  $CO_2$ . This pathway is represented in Fig. S1<sup>†</sup>. Finally, because of the extra  
9 molecular level components in the model from Hietala and Savage [17], monomers and feedstocks that  
10 are more oligomer-like are assigned as initial condition for the corresponding model components.

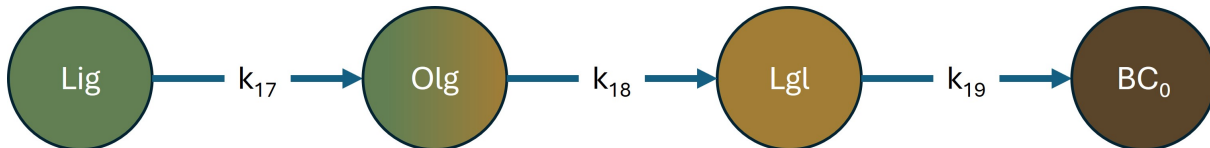

Figure S1<sup>†</sup>: The pathway added to the model from Hietala and Savage [17] where Lig: Lignin, Olg: Oligolignols, Lgl: lignols, and  $BC_0$ : biocrude with zero nitrogen content.

Table S4<sup>†</sup>: Statistics for correlating yields of solids, biocrude, aqueous, and gas wt.% from HTL using reaction engineering models and the fitting dataset (2949 yields).

| Model based off of        | Number of parameters | $Med[\epsilon]$ (wt%) | $ \bar{\epsilon} $ (wt%) | $Med[ \epsilon ]$ (wt%) | MAPE % | AIC     | % < 5 % | % < 10 % |
|---------------------------|----------------------|-----------------------|--------------------------|-------------------------|--------|---------|---------|----------|
| Valdez <i>et al.</i> [12] | 24                   | 1.50                  | 14.6                     | 9.50                    | 275    | 17915.6 | 29.9    | 51.7     |
| Sheehan and Savage [15]   | 48                   | 1.28                  | 13.5                     | 8.56                    | 134    | 17533.6 | 32.1    | 53.9     |
| Obeid <i>et al.</i> [3]   | 34                   | -0.165                | 13.9                     | 10.3                    | 176    | 17328.2 | 27.0    | 48.6     |
| Hietala and Savage [17]   | 38                   | 4.05                  | 15.6                     | 11.1                    | 126    | 18255.3 | 26.9    | 46.8     |
| This work                 | 56                   | 1.71                  | 13.0                     | 8.60                    | 133    | 17360.6 | 33.2    | 55.5     |

Table S5<sup>†</sup>: Statistics for predicting yields of solids, biocrude, aqueous, and gas wt.% from HTL using reaction engineering models and the prediction dataset (325 yields).

| Model based off of        | Number of parameters | $Med[\epsilon]$ (wt%) | $ \bar{\epsilon} $ (wt%) | $Med[ \epsilon ]$ (wt%) | MAPE % | % < 5 % | % < 10 % |
|---------------------------|----------------------|-----------------------|--------------------------|-------------------------|--------|---------|----------|
| Valdez <i>et al.</i> [12] | 24                   | 2.97                  | 15.1                     | 10.9                    | 154    | 27.4    | 48.3     |
| Sheehan and Savage [15]   | 48                   | 2.93                  | 13.7                     | 8.71                    | 128    | 35.1    | 53.2     |
| Obeid <i>et al.</i> [3]   | 34                   | 1.82                  | 15.6                     | 11.2                    | 185    | 23.1    | 46.2     |
| Hietala and Savage [17]   | 38                   | 4.50                  | 16.7                     | 11.9                    | 143    | 22.8    | 44.9     |
| This work                 | 56                   | 2.92                  | 13.2                     | 9.52                    | 135    | 32.9    | 51.4     |

Table S6<sup>†</sup>: Statistics for correlating biocrude wt.% only with reaction engineering models and the fitting dataset (1032 biocrude yields).

| Model based off of        | Number of parameters | $Med[\epsilon]$ (wt%) | $ \bar{\epsilon} $ (wt%) | $Med[ \epsilon ]$ (wt%) | MAPE % | AIC    | % < 5 % | % < 10 % |
|---------------------------|----------------------|-----------------------|--------------------------|-------------------------|--------|--------|---------|----------|
| Valdez <i>et al.</i> [12] | 24                   | -1.22                 | 9.44                     | 7.07                    | 119    | 5355.4 | 36.9    | 65.1     |
| Sheehan and Savage [15]   | 48                   | -1.08                 | 8.83                     | 6.44                    | 118    | 5247.5 | 41.2    | 66.7     |
| Obeid <i>et al.</i> [3]   | 34                   | -0.815                | 12.9                     | 10.5                    | 162    | 5853.1 | 26.7    | 47.6     |
| Hietala and Savage [17]   | 38                   | 1.07                  | 12.4                     | 9.30                    | 93.0   | 5910.3 | 30.4    | 52.8     |
| This work                 | 56                   | -0.0195               | 7.61                     | 5.84                    | 112    | 4939.7 | 44.5    | 72.0     |

Table S7<sup>†</sup>: Statistics for predicting biocrude wt.% only with reaction engineering models and the prediction dataset (112 biocrude yields).

| Model based<br>off of     | Number of<br>parameters | $Med[\epsilon]$<br>(wt%) | $ \epsilon $<br>(wt%) | $Med[ \epsilon ]$<br>(wt%) | MAPE<br>% | % < 5<br>% | % < 10<br>% |
|---------------------------|-------------------------|--------------------------|-----------------------|----------------------------|-----------|------------|-------------|
| Valdez <i>et al.</i> [12] | 24                      | 0.436                    | 10.7                  | 8.91                       | 98.4      | 32.1       | 55.4        |
| Sheehan and Savage [15]   | 48                      | -0.0952                  | 9.56                  | 7.05                       | 86.8      | 42.0       | 61.6        |
| Obeid <i>et al.</i> [3]   | 34                      | 3.91                     | 14.4                  | 11.9                       | 116       | 23.2       | 42.9        |
| Hietala and Savage [17]   | 38                      | 0.960                    | 14.1                  | 10.5                       | 70.7      | 17.9       | 50.0        |
| This work                 | 56                      | 0.950                    | 8.04                  | 5.53                       | 77.2      | 47.3       | 67.0        |

Table S8<sup>†</sup>: Statistics for initial fitting of machine learning models to the training dataset (825 biocrude yields).

| Model<br>label                  | Number of<br>parameters | $Med[\epsilon]$<br>(wt%) | $ \epsilon $<br>(wt%) | $Med[ \epsilon ]$<br>(wt%) | MAPE<br>% | AIC    | % < 5<br>% | % < 10<br>% |
|---------------------------------|-------------------------|--------------------------|-----------------------|----------------------------|-----------|--------|------------|-------------|
| Ridge Regression                | 16                      | 0.906                    | 9.25                  | 8.04                       | 118       | 4080   | 31.6       | 60.7        |
| Lasso Regression                | 16                      | 0.698                    | 9.26                  | 7.89                       | 118       | 4083   | 31.4       | 60.7        |
| Elastic Net<br>Regression       | 16                      | 0.698                    | 9.26                  | 7.89                       | 118       | 4083   | 31.4       | 60.7        |
| Random Forest<br>Algorithm      | 5930                    | -0.037                   | 2.07                  | 1.18                       | 17.9      | 13,900 | 90.8       | 97.9        |
| Gradient Boosting<br>Regression | 175                     | -0.240                   | 3.93                  | 3.05                       | 35.1      | 3097   | 71.6       | 94.2        |
| Support Vector<br>Machine       | 816                     | -0.000403                | 10.6                  | 8.80                       | 144       | 5978   | 30.9       | 56.6        |
| k-Nearest<br>Neighbors (k-NN)   | 5                       | -0.6                     | 5.99                  | 4.34                       | 73.4      | 3523   | 54.7       | 82.1        |
| Bayesian<br>Regression          | 18                      | 0.727                    | 9.27                  | 7.95                       | 118       | 4087   | 30.7       | 60.8        |
| Gaussian Process<br>Regression  | 7                       | 3.00e-10                 | 0.173                 | 3.00e-10                   | 1.36      | -160   | 99.2       | 99.8        |
| Huber Regression                | 16                      | 0.243                    | 9.14                  | 7.69                       | 128       | 4107   | 35.0       | 63.0        |
| Decision Forest<br>Regression   | 754                     | 0.000                    | 0.168                 | 0.000                      | 1.36      | 1393   | 99.0       | 99.8        |
| RANSAC<br>Regression            | 16                      | -0.107                   | 11.2                  | 7.58                       | 122       | 4793   | 37.5       | 61.0        |
| Generalized<br>Additive Model   | 301                     | 0.229                    | 6.17                  | 4.33                       | 75.4      | 4190   | 55.8       | 83.5        |

Table S9<sup>†</sup>: Statistics for initial prediction for machine learning models from the testing dataset (207 biocrude yields).

| Model label                  | Number of parameters | $Med[\epsilon]$ (wt%) | $ \overline{\epsilon} $ (wt%) | $Med[ \epsilon ]$ (wt%) | MAPE % | % < 5 % | % < 10 % |
|------------------------------|----------------------|-----------------------|-------------------------------|-------------------------|--------|---------|----------|
| Ridge Regression             | 16                   | 2.05                  | 9.13                          | 7.81                    | 95.5   | 30.0    | 69.6     |
| Lasso Regression             | 16                   | 1.94                  | 9.12                          | 7.78                    | 95.9   | 31.9    | 67.1     |
| Elastic Net Regression       | 16                   | 1.94                  | 9.12                          | 7.78                    | 95.9   | 31.9    | 67.1     |
| Random Forest Algorithm      | 5930                 | -0.426                | 4.79                          | 2.86                    | 41.7   | 65.7    | 87.9     |
| Gradient Boosting Regression | 175                  | -0.236                | 5.97                          | 4.44                    | 61.1   | 54.1    | 85.5     |
| Support Vector Machine       | 816                  | 1.05                  | 10.5                          | 8.16                    | 114    | 28.0    | 60.4     |
| k-Nearest Neighbors (k-NN)   | 5                    | -0.301                | 6.44                          | 4.62                    | 66.1   | 52.7    | 79.2     |
| Bayesian Regression          | 18                   | 1.75                  | 9.17                          | 7.75                    | 96.0   | 29.5    | 67.1     |
| Gaussian Process Regression  | 7                    | 22.3                  | 24.7                          | 22.3                    | 104    | 21.3    | 31.9     |
| Huber Regression             | 16                   | 1.29                  | 8.85                          | 7.39                    | 100    | 35.7    | 68.1     |
| Decision Forest Regression   | 754                  | 0.000                 | 6.55                          | 3.19                    | 55.9   | 60.9    | 79.7     |
| RANSAC Regression            | 16                   | 0.252                 | 12.8                          | 8.11                    | 115    | 30.9    | 58.0     |
| Generalized Additive Model   | 301                  | 1.23                  | 6.81                          | 4.95                    | 82.2   | 50.2    | 78.7     |

Table S10<sup>†</sup>: Statistics for final fitting machine learning models to the fitting dataset (1032 biocrude yields).

| Model label                  | Number of parameters | $Med[\epsilon]$ (wt%) | $ \overline{\epsilon} $ (wt%) | $Med[ \epsilon ]$ (wt%) | MAPE % | AIC    | % < 5 % | % < 10 % |
|------------------------------|----------------------|-----------------------|-------------------------------|-------------------------|--------|--------|---------|----------|
| Ridge Regression             | 16                   | 0.785                 | 9.16                          | 7.81                    | 115    | 5096   | 33.0    | 62.3     |
| Lasso Regression             | 16                   | 0.751                 | 9.18                          | 7.86                    | 116    | 5097   | 33.0    | 61.9     |
| Elastic Net Regression       | 16                   | 0.751                 | 9.18                          | 7.86                    | 116    | 5097   | 33.0    | 61.9     |
| Random Forest Algorithm      | 7339                 | -0.089                | 1.90                          | 1.22                    | 18.0   | 16,926 | 92.5    | 99.0     |
| Gradient Boosting Regression | 174                  | 0.0111                | 4.02                          | 3.03                    | 35.8   | 3835   | 70.4    | 93.2     |
| Support Vector Machine       | 1029                 | -0.0222               | 10.3                          | 8.44                    | 139    | 7433   | 31.2    | 58.4     |
| k-Nearest Neighbors (k-NN)   | 5                    | -0.385                | 5.44                          | 3.76                    | 66.5   | 4253   | 60.5    | 83.4     |
| Bayesian Regression          | 18                   | 0.804                 | 9.19                          | 7.93                    | 115    | 5101   | 32.2    | 62.3     |
| Gaussian Process Regression  | 7                    | 0.000                 | 0.207                         | 0.000                   | 1.50   | 5.01   | 99.1    | 99.8     |
| Huber Regression             | 16                   | 0.416                 | 9.00                          | 7.48                    | 118    | 5133   | 35.5    | 65.2     |
| Decision Forest Regression   | 924                  | 0.000                 | 0.230                         | 0.000                   | 1.56   | 2050   | 98.5    | 99.8     |
| RANSAC Regression            | 16                   | -2.00                 | 12.4                          | 8.54                    | 151    | 6022   | 30.8    | 56.0     |
| Generalized Additive Model   | 301                  | 0.214                 | 6.21                          | 4.32                    | 76.5   | 5115   | 55.1    | 82.8     |

Table S11<sup>†</sup>: Statistics for prediction from machine learning models from the prediction dataset (112 biocrude yields).

| Model label                  | Number of parameters | Med[ $\epsilon$ ] (wt%) | $ \epsilon $ (wt%) | Med[ $ \epsilon $ ] (wt%) | MAPE % | % < 5 % | % < 10 % |
|------------------------------|----------------------|-------------------------|--------------------|---------------------------|--------|---------|----------|
| Ridge Regression             | 16                   | 2.09                    | 9.65               | 8.35                      | 90.9   | 31.3    | 61.6     |
| Lasso Regression             | 16                   | 2.07                    | 9.71               | 8.28                      | 91.2   | 31.3    | 61.6     |
| Elastic Net Regression       | 16                   | 2.07                    | 9.71               | 8.28                      | 91.2   | 31.3    | 61.6     |
| Random Forest Algorithm      | 7339                 | 0.729                   | 5.63               | 4.04                      | 36.5   | 55.4    | 83.9     |
| Gradient Boosting Regression | 174                  | 0.338                   | 6.53               | 4.04                      | 39.1   | 58.9    | 78.6     |
| Support Vector Machine       | 1029                 | 3.88                    | 11.2               | 8.21                      | 106    | 23.2    | 59.8     |
| k-Nearest Neighbors (k-NN)   | 5                    | 1.21                    | 7.43               | 6.42                      | 65.2   | 43.8    | 75.9     |
| Bayesian Regression          | 18                   | 1.80                    | 9.65               | 8.23                      | 91.5   | 32.1    | 61.6     |
| Gaussian Process Regression  | 7                    | 29.7                    | 31.0               | 29.7                      | 96.0   | 8.93    | 16.1     |
| Huber Regression             | 16                   | 1.91                    | 9.73               | 7.93                      | 91.6   | 33.0    | 61.6     |
| Decision Forest Regression   | 924                  | 1.08                    | 6.64               | 4.60                      | 43.5   | 52.7    | 80.4     |
| RANSAC Regression            | 16                   | 1.41                    | 12.3               | 8.62                      | 114    | 24.1    | 55.4     |
| Generalized Additive Model   | 301                  | 1.88                    | 6.86               | 4.92                      | 48.1   | 50.0    | 80.4     |

## References

- [1] P. J. Valdez and P. E. Savage, *Algal Research*, 2013, **2**, 416–425.
- [2] D. C. Hietala, J. L. Faeth and P. E. Savage, *Bioresource Technology*, 2016, **214**, 102–111.
- [3] R. Obeid, D. M. Lewis, N. Smith, T. Hall and P. van Eyk, *Chemical Engineering Journal*, 2020, **389**, 124397.
- [4] L. Qian, S. Wang and P. E. Savage, *Applied Energy*, 2020, **260**, 114312.
- [5] R. Obeid, N. Smith, D. M. Lewis, T. Hall and P. van Eyk, *Chemical Engineering Journal*, 2022, **428**, 131228.
- [6] J. S. Saral, D. G. C. V. Reddy and P. Ranganathan, *Biomass Conversion and Biorefinery*, 2022, **1**, 1–9.
- [7] M. Déniel, G. Haarlemmer, A. Roubaud, E. Weiss-Hortala and J. Fages, *Waste and Biomass Valorization*, 2017, **8**, 2087–2107.
- [8] J. Yang, Q. S. He, H. Niu, K. Corcadden and T. Astatkie, *Applied Energy*, 2018, **228**, 1618–1628.
- [9] J. Lu, Z. Liu, Y. Zhang and P. E. Savage, *ACS Sustainable Chemistry & Engineering*, 2018, **6**, 14501–14509.
- [10] J. Yang, Q. S. He, K. Corcadden, H. Niu, J. Lin and T. Astatkie, *Applied Energy*, 2019, **233-234**, 906–915.
- [11] S. Mahadevan Subramanya and P. E. Savage, *ACS Sustainable Chemistry & Engineering*, 2021, **9**, 13874–13882.
- [12] P. J. Valdez, V. J. Tocco and P. E. Savage, *Bioresource Technology*, 2014, **163**, 123–127.

- 31 [13] T. K. Vo, O. K. Lee, E. Y. Lee, C. H. Kim, J.-W. Seo, J. Kim and S.-S. Kim, *Chemical Engineering*  
32 *Journal*, 2016, **306**, 763–771.
- 33 [14] T. K. Vo, S.-S. Kim, H. V. Ly, E. Y. Lee, C.-G. Lee and J. Kim, *Bioresource Technology*, 2017, **241**,  
34 610–619.
- 35 [15] J. D. Sheehan and P. E. Savage, *Bioresource Technology*, 2017, **239**, 144–150.
- 36 [16] A. Palomino, L. C. Montenegro-Ruíz and R. D. Godoy-Silva, *Algal Research*, 2019, **44**, 101669.
- 37 [17] D. C. Hietala and P. E. Savage, *Chemical Engineering Journal*, 2021, **407**, 127007.
- 38 [18] P. Biller and A. B. Ross, *Bioresource technology*, 2011, **102**, 215–25.
- 39 [19] G. Teri, L. Luo and P. E. Savage, *Energy & Fuels*, 2014, **28**, 7501–7509.
- 40 [20] S. Leow, J. R. Witter, D. R. Vardon, B. K. Sharma, J. S. Guest and T. J. Strathmann, *Green*  
41 *Chemistry*, 2015, **17**, 3584–3599.
- 42 [21] Y. Li, S. Leow, A. C. Fedders, B. K. Sharma, J. S. Guest and T. J. Strathmann, *Green Chemistry*,  
43 2017, **19**, 1163–1174.
- 44 [22] R. Shakya, S. Adhikari, R. Mahadevan, S. R. Shanmugam, H. Nam, E. B. Hassan and T. A. Demp-  
45 ster, *Bioresource Technology*, 2017, **243**, 1112–1120.
- 46 [23] D. C. Hietala, C. K. Koss, A. Narwani, A. R. Lashaway, C. M. Godwin, B. J. Cardinale and P. E.  
47 Savage, *Algal Research*, 2017, **26**, 203–214.
- 48 [24] L. Sheng, X. Wang and X. Yang, *Bioresource Technology*, 2018, **247**, 14–20.
- 49 [25] J. Wagner, R. Bransgrove, T. A. Beacham, M. J. Allen, K. Meixner, B. Drosig, V. P. Ting and C. J.  
50 Chuck, *Bioresource Technology*, 2016, **207**, 166–174.
- 51 [26] A. Aierzhati, M. J. Stablein, N. E. Wu, C.-T. Kuo, B. Si, X. Kang and Y. Zhang, *Bioresource*  
52 *Technology*, 2019, **284**, 139–147.
